# Supplementary material
Source: Springer Nature journal article supplement (https://www.springermedizin.de/resource/supplementary/12872_2012_854_MOESM7_ESM.pdf/9430606)

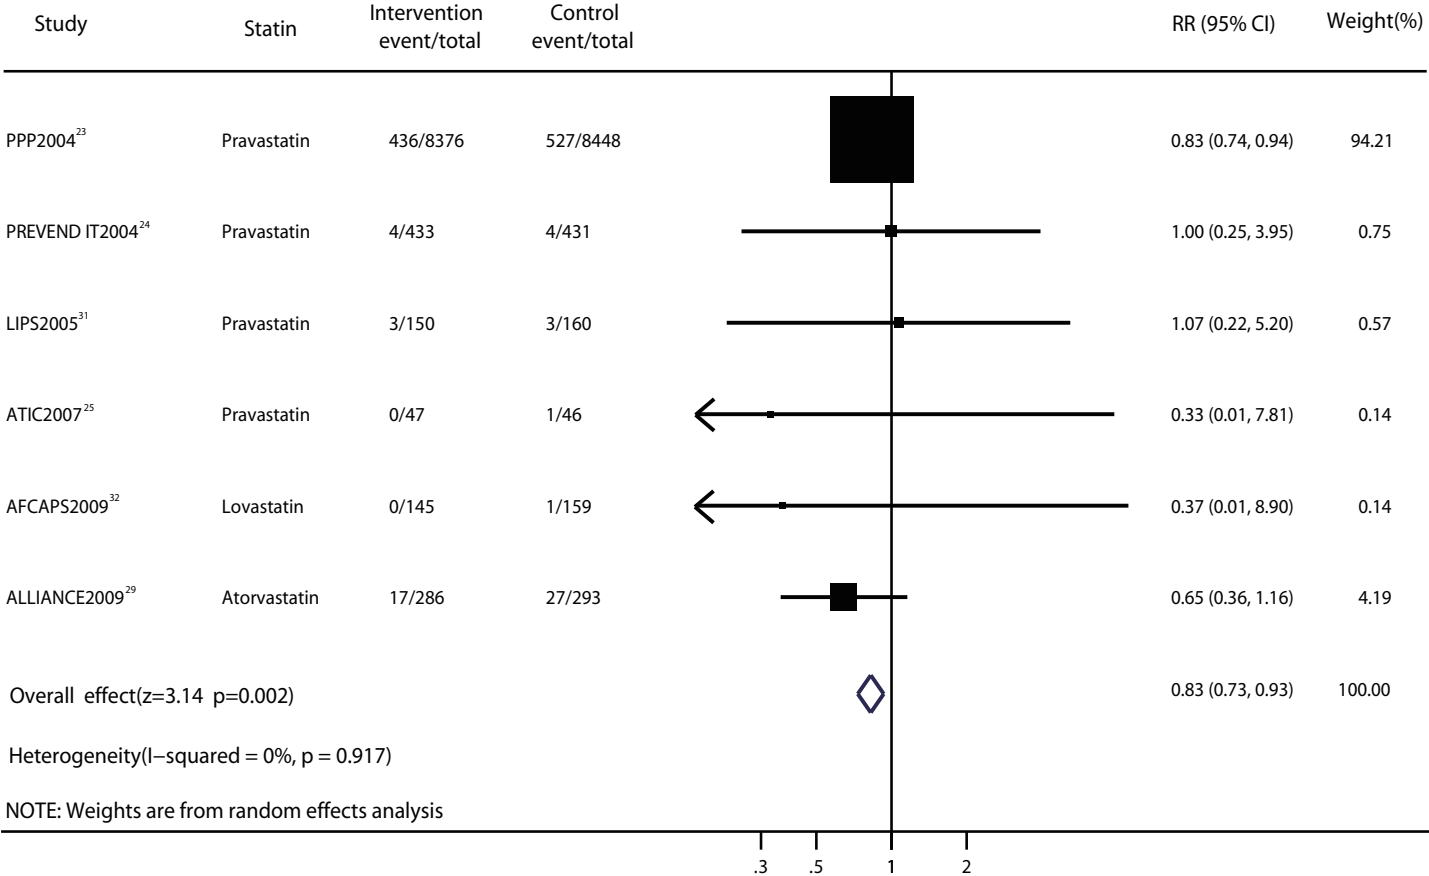

Supplement: MOESM7 [file 9430606]
